# Multi-study inference of regulatory networks for more accurate models of gene regulation

Dayanne M. Castro<sup>1</sup>, Nicholas R. de Veaux<sup>2</sup>, Emily R. Miraldi<sup>3,4</sup>, Richard Bonneau<sup>1,2</sup>

**1** New York University, New York, NY 10003, USA

**2** Center for Computational Biology, Flatiron Institute, New York, NY 10010, USA

**3** Department of Pediatrics, University of Cincinnati College of Medicine, Cincinnati, OH 45229, USA

**4** Divisions of Immunobiology & Biomedical Informatics, Cincinnati Children's Hospital, Cincinnati, OH 45229, USA

\* rb133@nyu.edu

## Abstract

Gene regulatory networks are composed of sub-networks that are often shared across biological processes, cell-types, and organisms. Leveraging multiple sources of information, such as publicly available gene expression datasets, could therefore be helpful when learning a network of interest. Integrating data across different studies, however, raises numerous technical concerns. Hence, a common approach in network inference, and broadly in genomics research, is to separately learn models from each dataset and combine the results. Individual models, however, often suffer from under-sampling, poor generalization and limited network recovery. In this study, we explore previous integration strategies, such as batch-correction and model ensembles, and introduce a new multitask learning approach for joint network inference across several datasets. Our method initially estimates the activities of transcription factors, and subsequently, infers the relevant network topology. As regulatory interactions are context-dependent, we estimate model coefficients as a combination of both dataset-specific and conserved components. In addition, adaptive penalties may be used to favor models that include interactions derived from multiple sources of prior knowledge including orthogonal genomics experiments. We evaluate generalization and network recovery using examples from *Bacillus subtilis* and *Saccharomyces cerevisiae*, and show that sharing information across models improves network reconstruction. Finally, we demonstrate robustness to both false positives in the prior information and heterogeneity among datasets.

## Introduction

Gene regulatory network inference aims at computationally deriving and ranking regulatory hypotheses on transcription factor-target gene interactions [1–3]. Often, these regulatory models are learned from gene expression measurements across a large number of samples. Strategies to obtain such data range from combining several publicly available datasets to generating large expression datasets from scratch [4–7]. Given decreasing costs of sequencing and the exponential growth in the availability of gene expression data in public databases [8, 9], data integration across several studies becomes particularly promising for an increasing number of biological systems.

In theory, multi-study analyses provide a better representation of the underlying cellular regulatory network, possibly revealing insights that could not be uncovered from individual studies [6]. In practice, however, biological datasets are highly susceptible to batch effects [10], which are systematic sources of technical variation due to different reagents, machines, handlers etc. that complicate omics meta-analyses [11, 12]. Although several methods to remove batch effects from expression data have been developed, they often rely on evenly distributed experimental designs across batches [13, 14]. Batch-correction methods may deflate relevant biological variability or induce incorrect differences between experimental groups when conditions are unbalanced across batches, which can significantly affect downstream analyses [15]. Therefore these batch effect removal methods are not applicable when integrating public data from multiple sources with widely differing experimental designs.

In network inference, an approach often taken to bypass batch effects is to learn models from each dataset separately and combine the resulting networks [16, 17]. Known as ensemble learning, this idea of synthesizing several weaker models into a stronger aggregate model is commonly used in machine learning to prevent overfitting and build more generalizable prediction models [18]. In several scenarios, ensemble learning avoids introducing additional artifacts and complexity that may be introduced by explicitly

modeling batch effects. On the other hand, the relative sample size of each dataset is smaller when using ensemble methods, likely decreasing the ability of an algorithm to detect relevant interactions. As regulatory networks are highly context-dependent [19], for example, TF binding to several promoters is condition-specific [20], a drawback for both batch-correction and ensemble methods is that they produce a single network model to explain the data across datasets. Relevant dataset-specific interactions might not be recovered, or just difficult to tell apart using a single model.

Although it will not be the primary focus of this paper, most modern network inference algorithms integrate multiple data-types to derive prior or constraints on network structure. These priors/constraints have been shown to dramatically improve network model selection performance when combined with the state variables provided by expression data. In these methods [17, 21], priors or constraints on network structure (derived from multiple sources like known interactions, ATAC-seq, DHS, or ChIP-seq experiments [22–24]) are used to influence the penalty on adding model components, where edges in the prior are effectively penalized less. Here we describe a method that builds on that work (and similar work in other fields), but in addition we let model inference processes (each carried out using a separate data-set) influence each others model penalties, so that edges that agree across inference tasks are more likely to be uncovered [25–31]. Several previous works on this front focused on enforcing similarity across models by penalizing differences on strength and direction of regulatory interactions using a fusion penalty [25, 27, 28]. Because the influence of regulators on the expression of targets may vary across datasets, possibly even due to differences in measurement technologies, we look to induce similarity on network structure (the choice of regulators) using a group-sparse penalty. Previous methods also applied this type of penalty [26, 29, 31], however, they were not robust to differences in relevant edges across datasets.

Here we propose a multitask learning (MTL) approach to exploit cross-dataset commonalities while recognizing differences and is able to incorporate prior knowledge on network structure if available [32, 33]. In this framework, information flow across datasets

leads the algorithm to prefer solutions that better generalize across domains, thus 56  
reducing chances of overfitting and improving model predictive power [34]. Since biological 57  
datasets are often under-sampled, we hypothesize that sharing information across models 58  
inferred from multiple datasets using an explicit multitask learning framework will improve 59  
accuracy of inferred network models in a variety of common experimental designs/settings. 60

In this paper, we explicitly show that joint inference significantly improves network recovery 61  
using examples from two model organisms, *Bacillus subtilis* and *Saccharomyces* 62  
*cerevisiae*. We show that models inferred for each dataset using our MTL approach (which 63  
adaptively penalizes conserved and data-set-unique model components separately) are 64  
vastly more accurate than models inferred separately using a single-task learning (STL) 65  
approach. We also explore commonly used data integration strategies, and show that MTL 66  
outperforms both batch-correction and ensemble approaches. In addition, we also 67  
demonstrate that our method is robust to noise in the input prior information. Finally, we 68  
look at conserved and dataset-specific inferred interactions, and show that our method can 69  
leverage cross-dataset commonalities, while being robust to differences. 70

## Results 72

### Overview of network inference algorithm 73

To improve regulatory network inference from expression data, we developed a framework 74  
that leverages training signals across related expression datasets. For each gene, we 75  
assume that its regulators may overlap across conditions in related datasets, and thus we 76  
could increase our ability to uncover accurate regulatory interactions by inferring them 77  
jointly. Our method takes as input multiple expression datasets and priors on network 78  
structure, and then outputs regulatory hypotheses associated with a confidence score 79  
proportional to our belief that each prediction is true (Fig 1A). As previous 80

studies [17, 35–37], our method also includes an intermediate step that estimates transcription factor activities (TFA), and then, models gene expression as a function of those estimates (Fig 1B).

In our model, TFA represent a relative quantification of active protein that is inducing or repressing the transcription of its targets in a given sample, and is an attempt to abstract away unmeasured factors that influence TFA in a living cell [37–39], such as post-translational regulation [40], protein-protein interactions [41], and chromatin accessibility [42]. We estimate TFA from partial knowledge of the network topology (Fig 1C) [21, 43–47] and gene expression data as previously proposed (Fig 1D) [17]. This is comparable to using a TF's targets collectively as a reporter for its activity.

Next, we learn the dependencies between gene expression and TFA and score predicted interactions. In this step, our method departs from previous work, and we employ multitask learning to learn regulatory models across datasets jointly, as opposed to single-task learning, where network inference is performed for each dataset independently (Fig 1E). As genes are known to be regulated by a small number of TFs [48], we can assume that these models are sparse, that is, they contain only a few nonzero entries [3]. We thus implement both approaches using sparsity-inducing penalties derived from the lasso [49]. Here the network model is represented as a matrix for each target gene (where columns are data-sets/cell-types/studies and rows are potential regulators) with signed entries corresponding to strength and type of regulation.

Importantly, our MTL approach decomposes this model coefficients matrix into a dataset-specific component and a conserved component to enable us to penalize dataset-unique and conserved interactions separately for each target gene [32]; this separation captures differences in regulatory networks across datasets (Fig 2). Specifically, we apply an  $l_1/l_\infty$  penalty to the one component to encourage similarity between network models [50], and an  $l_1/l_1$  penalty to the other to accommodate differences [32]. We also incorporate prior knowledge by using adaptive weights when penalizing different

coefficients in the  $l_1/l_1$  penalty [33]. Finally, we perform this step for several bootstraps of the conditions in the expression and activities matrices, and calculate a confidence score for each predicted interaction that represents both the stability across bootstraps and the proportion of variance explained of the target expression dependent on each predictor.

Our method is readily available in an open-source package, *Inferelator-AMuSR* (**A**daptive **M**ultiple **S**parse **R**egression), enabling TF activity estimation and multi-source gene regulatory network inference, ultimately facilitating mechanistic interpretations of gene expression data to the Biology community. In addition, this method allows for adaptive penalties to favor interactions with prior knowledge proportional to the user-defined belief that interactions in the prior are true. Finally, our implementation also includes several mechanisms that speed-up computations, making it scalable for the datasets used here, and support for parallel computing across multiple nodes and cores in several computing environments.

## **Model organisms, expression datasets, and priors**

We validated our approach using two model organisms, a gram-positive bacteria, *B. subtilis*, and an eukaryote, *S. cerevisiae*. Availability of validated TF-target regulatory interactions, hereafter referred to as the gold-standard, make both organisms a good choice for exploring inference methods (3040 interactions, connecting 153 TFs to 1822 target genes for *B. subtilis* [17, 46], 1198 interactions connecting 91 TFs to 842 targets for *S. cerevisiae* [51]). For *B. subtilis*, we use two expression datasets. The first one, *B. subtilis 1*, was collected for strain PY79 and contains multiple knockouts, competence and sporulation-inducing conditions, and chemical treatments (429 samples, 38 experimental designs with multiple time-series experiments) [17]. The second dataset, *B. subtilis 2*, was collected for strain BSB1 and contains several nutritional, and other environmental stresses, as well as competence and sporulation-inducing conditions (269 samples, and 104 conditions) [52]. For *S. cerevisiae*, we downloaded three expression datasets from the

SPELL database [53]. *S. cerevisiae 1* is a compendium of steady-state chemostat cultures 134  
with several combinations of cultivation parameters (170 samples, 55 conditions) [54]. *S.* 135  
*cerevisiae 2* profiles two yeast strains (BY and RM) grown with two carbon sources, 136  
glucose and ethanol, in different concentrations (246 samples, and 109 conditions) [55]. 137  
Finally, *S. cerevisiae 3* with expression profiles following several mutations and chemical 138  
treatments (300 samples) [56]. Each dataset was collected using a different microarray 139  
platform. Cross-platform data aggregation is well known to cause strong batch effects [10]. 140  
For each species, we considered the set of genes present across datasets. 141

In our inference framework, prior knowledge on network topology is essential to first 142  
estimate transcription factor activities and to then bias model selection towards 143  
interactions with prior information during the network inference stage of the algorithm. 144  
Therefore, to properly evaluate our method, it is necessary to gather prior interactions 145  
independent of the ones in the gold-standard. For *B. subtilis*, we adopt the previously used 146  
strategy of partitioning the initial gold-standard into two disjoint sets, a prior for use in 147  
network inference and a gold-standard to evaluate model quality [17]. For *S. cerevisiae*, on 148  
the other hand, we wanted to explore a more realistic scenario, where a gold-standard is 149  
often not available. In the absence of such information, we hypothesized that orthogonal 150  
high-throughput datasets would provide insight. Because the yeast gold-standard [51] was 151  
built as a combination of TF-binding (ChIP-seq, ChIP-ChIP) and TF knockout datasets 152  
available in the YEASTRACT [47] and the SGD [57] databases, we propose to derive prior 153  
knowledge from chromatin accessibility data [22, 23] and TF binding sites [58] (as this is a 154  
realistic and efficient genomic experimental design for non-model organisms). Open 155  
regions in the genome can be scanned for transcription factor binding sites, which can 156  
provide indirect evidence of regulatory function [59]. We then assigned TFs to the closest 157  
downstream gene, and built a prior matrix where entries represent the number of motifs for 158  
a particular TF that was associated to a gene [60, 61]. We obtained a list of regulators from 159  
the YeastMine database [62], which we also used to sign entries in the prior: interactions 160  
for regulators described as repressors were marked as negative. Because genome-wide 161

measurements of DNA accessibility can be obtained in a single experiment, using 162  
techniques that take advantage of the sensitivity of nucleosome-free DNA to endonuclease 163  
digestion (DNase-seq) or to Tn5 transposase insertion (ATAC-seq) [63], we expect this 164  
approach to be generalizable to several biological systems. 165

## **Sharing information across network models via multitask learning 166** **improves model accuracy 167**

Using the above expression datasets and priors, we learn regulatory networks for each 168  
organism employing both single-task and our multitask approaches. To provide an intuition 169  
for cross-dataset transfer of knowledge, we compare confidence scores attributed to a 170  
single gold-standard interaction using either STL or MTL for each organism. For *B. subtilis*, 171  
we look at the interaction between the TF *sigB* and the gene *ydfP* (Fig 3A). The 172  
relationship between the *sigB* activity and *ydfP* expression in the first dataset *B. subtilis 1* 173  
is weaker than in *B. subtilis 2*. This is reflected in the predicted confidence scores, a 174  
quarter as strong for *B. subtilis 1* than for *B. subtilis 2*, when each dataset is used 175  
separately to learn networks through STL. On the other hand, when we learn these 176  
networks in the MTL framework, information flows from *B. subtilis 2* to *B. subtilis 1*, and we 177  
assign a high confidence score to this interaction in both networks. Similarly, for *S.* 178  
*cerevisiae*, we look at the interaction between the TF *Rap1* and the target gene *Rpl12a* 179  
(Fig 3B). In this particular case, we observe a strong and easier-to-uncover relationship 180  
between *Rap1* estimated activity and *Rpl12a* expression for all datasets. Indeed, we 181  
assign a nonzero confidence score to this interaction for all datasets using STL, although 182  
for *S. cerevisiae 2 and 3* these are much smaller than the scores attributed when networks 183  
are learned using MTL. 184

In order to evaluate the overall quality of the inferred networks, we use area under 185  
precision-recall curves (AUPR) [16], widely used to quantify a classifier's ability to 186  
distinguish two classes and to rank predictions. Networks learned using MTL are 187



significantly more accurate than networks learned using the STL approach. For *B. subtilis* (Fig 3D), we observe around a 30% gain in AUPR for both datasets, indicating significant complementarity between the datasets. For *S. cerevisiae* (Fig 3E), we observe a clear increase in performance for networks inferred for every dataset, indicating that our method is very robust to both data heterogeneity and potential false edges derived from chromatin accessibility in the prior. These experiments were also performed using TF expression as covariates, instead of TF activities, and those results are shown at (Fig S1A, B). Although we recommend using TFA for the organisms here tested, MTL also improves the performance for each dataset-specific network in this scenario.

### **Benefits of multitask learning exceed those from batch-correction and ensemble methods**

Next, we asked whether the higher performance of the MTL framework could be achieved by other commonly used data integration strategies, such as batch-correction and ensemble methods. Ensemble methods include several algebraic combinations of predictions from separate classifiers trained within a single-domain (sum, mean, maximum, minimum [64]). To address this question, we evaluated networks inferred using all available data. First, we combined regulatory models inferred for each dataset either through STL or MTL by taking the average rank for each interaction, generating two networks hereafter called STL-C and MTL-C [16]. For each organism, we also merged all datasets into one, and applied ComBat for batch-correction [65], because of its perceived higher performance [66]. We then learn network models from these larger batch-corrected datasets, STL-BC. Both for *B. subtilis* (Fig 4A) and *S. cerevisiae* (Fig 4B), the MTL-C networks outperform the STL-C and STL-BC networks, indicating that cross-dataset information sharing during modelling is a better approach to integrate datasets from different domains. Interestingly, for *B. subtilis*, the STL-BC network has a higher performance than the STL-C network, whereas for yeast we observe the opposite. We

speculate that the higher overlap between the conditions in the two *B. subtilis* datasets 214  
improved performance of the batch-correction algorithm here used. For yeast, on the other 215  
hand, conditions were very different across datasets, and although much new information 216  
is gained by merging datasets into one, it is likely that incorrect relationships between 217  
genes were induced as an artifact, possibly confounding the inference. Of note, these 218  
approaches emphasize the commonalities across datasets, whereas the motivation to use 219  
MTL frameworks is to increase statistical power, while maintaining separate models for 220  
each dataset, hopefully improving interpretability. These experiments were also performed 221  
using TF expression as covariates, instead of TF activities, and those results are shown at 222  
(Fig S2A, B). In that case, results hold for yeast, but not for *B. subtilis*. 223

### **Our method is robust to increasing prior weights and noise in prior** 224

Because genes are frequently co-regulated, and biological networks are redundant and 225  
robust to perturbations, spurious correlations between transcription factors and genes are 226  
highly prevalent in gene expression data [67, 68]. To help discriminate true from false 227  
interactions, it is essential to incorporate prior information to bias model selection towards 228  
interactions with prior knowledge. Indeed, incorporating prior knowledge has been shown 229  
to increase accuracy of inferred models in several studies [3, 21, 69]. 230

For example, suppose that two regulators present highly correlated activities, but regulate 231  
different sets of genes. A regression-based model would be unable to differentiate 232  
between them, and only other sources of information, such as binding evidence nearby a 233  
target gene, could help selecting one predictor over the other in a principled way. Thus, we 234  
provide an option to integrate prior knowledge to our MTL approach in the model selection 235  
step by allowing the user to input a “prior weight”. This weight is used to increase presence 236  
of prior interactions to the final model, and should be proportional to the quality of the input 237  
prior. 238

Sources of prior information for the two model organisms used in this study are 239

fundamentally different. The *B. subtilis* prior is high-quality, derived from small-scale 240  
experiments, whereas the *S. cerevisiae* prior is noisier, likely with both high false-positive 241  
and false-negative rates, derived from high-throughput chromatin accessibility experiments 242  
and TF binding motifs. To understand differences in prior influences for the same 243  
organism, we also include the yeast gold-standard as a possible source of prior in this 244  
analysis. The number of TFs per target gene in the *B. subtilis* (Fig 5A) and the *S.* 245  
*cerevisiae* (Fig 5B) gold-standards (GS) is hardly ever greater than 2, with median of 1, 246  
whereas for the chromatin accessibility-derived priors (ATAC) for *S. cerevisiae*, the median 247  
is 11 (Fig 5C). A large number of regulators per gene likely indicates a high false-positive 248  
rate in the yeast ATAC prior. Given the differences in prior quality, we test the sensitivity of 249  
our method to the prior weight parameter. We applied increasing prior weights, and 250  
measured how the confidence scores attributed to prior interactions was affected (Fig 5D) 251  
for the three source of priors described above. Interestingly, the confidence scores 252  
distributions show dependencies on both the prior quality and the prior weights. When the 253  
gold-standard interactions for *B. subtilis* and *S. cerevisiae* are used as prior knowledge, 254  
they receive significantly higher scores than interactions in the *S. cerevisiae* chromatin 255  
accessibility-derived prior, which is proportional to our belief on the quality of the input prior 256  
information. Importantly, even when we set the prior weight value to a very high value, 257  
such as 10, interactions in the ATAC prior are not pushed to very high confidence scores, 258  
suggesting that our method is robust to the presence of false interactions in the prior. 259

In order to test this hypothesis, we artificially introduced false edges to both the *B. subtilis* 260  
and the yeast gold-standards. We added 1 randomly chosen “false” interaction for every 5 261  
true edges in the gold-standard. That affects both TFA estimation and model selection (for 262  
prior weights greater than 1). We then ran the inference using the *Inferelator-AMuSR* 263  
method with increasing prior weights, and evaluated both the confidence scores of 264  
recovered true and false interactions (Fig 5C) as well as the counts of true and false 265  
interactions that receive non-zero confidence scores (Fig 5D). For both *B. subtilis* and 266  
yeast, we notice that confidence scores distributions show dependency on whether edges 267

are true or false, indicating that the method is not overfitting the prior for the majority of 268  
datasets, even when prior weights used are as high as 10 (Fig 5C). We speculate that the 269  
greater completeness of the *B. subtilis* gold-standard and of the expression datasets make 270  
it easier to differentiate true from false prior interactions when compared to yeast. Besides, 271  
inferring networks for prokaryotes is regarded as an easier problem [16]. Importantly, we 272  
also show the number of non-zero interactions in each of these distributions (Fig 5D). 273  
Taken together, these results show that our method is robust to false interactions in the 274  
prior, but requires the user to choose an appropriate prior weight for the specific 275  
application. As in previous studies [43], in the presence of a gold-standard, we 276  
recommend the user to evaluate performance in leave-out sets of interactions to determine 277  
the best prior weight to be used. In the absence of a gold-standard, priors are likely to be 278  
of lower confidence, and therefore, smaller prior weights should be used. 279

### **Joint network inference is robust to dataset heterogeneity**

 280

Because multitask learning approaches are inclined to return models that are more similar 281  
to each other, we sought to understand how heterogeneity among datasets affected the 282  
inferred networks. Specifically, we quantified the overlap between the networks learned for 283  
each dataset for *B. subtilis* and yeast. That is, the number of edges that are unique or 284  
shared across networks inferred for each dataset (Fig 6). In this analysis, we consider 285  
valid only predictions within a 0.5 precision cut-off, calculated using only TFs and genes 286  
present in the gold-standard. Since the *B. subtilis* datasets share more conditions than the 287  
yeast datasets, we hypothesized that the *B. subtilis* networks would have a higher overlap 288  
than the yeast networks. As expected, we observe that about 40% of the total edges are 289  
shared among two *B. subtilis* networks (Fig 6A), whereas for yeast only about 27% 290  
(Fig 6B) and 22% (Fig 6C), using gold-standard and chromatin accessibility-derived priors 291  
respectively, of the total number of edges is shared by at least two of the three inferred 292  
networks. Therefore, our approach for joint inference is robust to cross-dataset influences, 293  
preserving relative uniqueness when datasets are more heterogeneous. 294

## Discussion

295

In this study, we presented a multitask learning approach for joint inference of gene  
regulatory networks across multiple expression datasets that improves performance and  
biological interpretation by factoring network models derived from multiple datasets into  
conserved and dataset-specific components. Our approach is designed to leverage  
cross-dataset commonalities while preserving relevant differences. While other multitask  
methods for network inference penalize for differences in model coefficients across  
datasets [25–28, 30], our method leverages shared underlying topology rather than the  
influence of TFs on targets. We expect this method to be more robust, because, in living  
cells, a TF's influence on a gene's expression can change in different conditions. In  
addition, previous methods either deal with dataset-specific interactions [25], or apply  
proper sparsity inducing regularization penalties [26–30]. Our approach, on the other hand,  
addresses both concerns. Finally, we implemented an additional feature to allow for  
incorporation of prior knowledge on network topology in the model selection step.

296  
297  
298  
299  
300  
301  
302  
303  
304  
305  
306  
307  
308

Using two different model organisms, *B. subtilis* and *S. cerevisiae*, we show that joint  
inference results in accurate network models. We also show that multitask learning leads  
to more accurate models than other data integration strategies, such as batch-correction  
and combining fitted models. Generally, the benefits of multitask learning are more obvious  
when task overlap is high and datasets are slightly under-sampled [34]. Our results  
support this principle, as the overall performance increase of multitask network inference  
for *B. subtilis* is more pronounced than for *S. cerevisiae*, which datasets sample more  
heterogeneous conditions. Therefore, to benefit from this approach, defining input  
datasets that share underlying regulatory mechanisms is essential and user-defined.

309  
310  
311  
312  
313  
314  
315  
316  
317

A key question here, that requires future work, is the partitioning of data into separate  
datasets. Here we use the boundaries afforded by previous study designs: we use data  
from two platforms and two strains for *B. subtilis* (a fairly natural boundary) and the  
separation between studies by different groups (again using different technologies) in

318  
319  
320  
321

yeast. We choose these partitions to illustrate robustness to the more common sources of 322  
batch effect in meta-analysis. In the future, we expect that multitask methods in this 323  
domain will integrate dataset partition estimation (which data go in which bucket) with 324  
network inference. Such methods would ideally be able to estimate task similarity, taking 325  
into account principles of regulatory biology, and apply a weighted approach to information 326  
sharing. In addition, a key avenue for future work will be to adapt this method to 327  
multi-species studies. Examples of high biological and biomedical interest include joint 328  
inferences across model systems and organisms of primary interest (for example 329  
data-sets that include mouse and human data collected for similar cell types in similar 330  
conditions). These results (and previous work on many fronts [7, 25, 70]) suggest that this 331  
method would perform well in this setting. Nevertheless, because of the increasing 332  
practice of data sharing in Biology, we speculate that cross-study inference methods will 333  
be largely valuable in the near future, being able to learn more robust and generalizable 334  
hypotheses and concepts. Although we present this method as an alternative to batch 335  
correction, we should point out that there are many uses to batch correction that fall 336  
outside of the scope of network inference, and our results do not lessen the applicability of 337  
batch correction methods to these many tasks. There is still great value in properly 338  
balancing experimental designs when possible to allow for the estimation of specific gene- 339  
and condition-wise batch effects. Experiments where we interact MTL learning with 340  
properly balanced designs and quality batch correction are not provided here, but would be 341  
superior. Thus, the results here should be strictly interpreted in the context of network 342  
inference, pathway inference, and modeling interactions. 343

## Methods 344

### Expression data selection, preprocessing and batch-correction 345

For *B. subtilis*, we downloaded normalized expression datasets from the previously 346  
published network study by Arrieta-Ortiz *et al* [17]. Both datasets are available at GEO, *B.* 347  
*subtilis* 1 with accession number GSE67023 [17] and *B. subtilis* 2 with accession number 348  
GSE27219 [52]. For yeast, we downloaded expression datasets from the SPELL database, 349  
where hundreds of re-processed gene expression data is available for this organism. In 350  
particular, we selected three datasets from separate studies based on the number of 351  
samples, within-dataset condition diversity, and cross-dataset condition overlap (such as 352  
nutrient-limited stress). *S. cerevisiae* 1 and *S. cerevisiae* 2 are also available at GEO at 353  
accession numbers GSE11452 [54] and GSE9376 [55]. *S. cerevisiae* 3 does not have a 354  
GEO accession number, and was collected in a custom spotted microarray [56]. For 355  
network inference, we only kept genes present in all datasets, resulting in 3780 and 4614 356  
genes for *B. subtilis* and for yeast respectively. In order to join merge, for comparison, we 357  
consider each dataset to be a separate batch, since they were generated in different labs 358  
as part of separate studies, and applied ComBat for batch-correction using default 359  
parameters and no reference to experimental designs [65]. 360

### Building priors from chromatin accessibility 361

#### ATAC-seq data download, processing, and peak calling 362

We downloaded chromatin accessibility data for *S. cerevisiae* from the European 363  
Nucleotide Archive (PRJNA276699) [71, 72]. Reads were mapped to the sacCer3 genome 364  
(iGenomes, UCSC) using bowtie2 [73] with the options `–very-sensitive –maxins 2000`. 365  
Reads with low mapping quality (MAPQ < 30), or that mapped to mitochondrial DNA were 366  
removed. Duplicates were removed using Picard. Reads mapping the forward strand were 367

offset by +4 bp, and reads mapping to the reverse strand -4 bp. Accessible regions were 368  
called using MACS2 [74] with the options `-qvalue 0.01 -gsize 12100000 -nomodel -shift` 369  
`20 -extsize 40`. We defined the union of peaks called in any the ATAC-seq samples as the 370  
set of putative regulatory regions. 371

## **Motifs download, assignment to target genes, and prior generation** 372

We obtained a set of expert-curated motifs for *S. cerevisiae* containing position frequency 373  
matrices for yeast transcription factors from The Yeast Transcription Factor Specificity 374  
Compendium motifs (YeTFaSCo) [75]. Then, we scanned the whole yeast genome for 375  
occurrences of motifs using FIMO with p-value cutoff  $1e-4$  [59], and kept motifs that 376  
intersected with putative regulatory regions. Each motif was then assigned to the gene 377  
with closest downstream transcription start site. Gene annotations were obtained from the 378  
Saccharomyces Genome Database (SGD) [76]. A list of putative regulators was 379  
downloaded from the YeastMine database [62], and then generated a targets-by-regulators 380  
matrix (prior) where entries are the count of motifs for a particular regulator assigned to 381  
each gene. Finally, we multiplied entries for repressors by -1. 382

## **Network inference** 383

We approach network inference by modeling gene expression as a weighted sum of the 384  
activities of transcription factors [17, 36]. Our goal is to learn these weights from gene 385  
expression data as accurately as possible. In this section, we explain our core model of 386  
gene regulation, and of transcription factor activities, and state our assumptions. We also 387  
describe how we extend our framework to support learning of multiple networks 388  
simultaneously, and integration of prior knowledge on network structure. Finally, we explain 389  
how we rank predicted interactions which is used to evaluate the ability of these methods 390  
to recover the known underlying network. 391



## Core model

392

We model the expression of a gene  $i$  at condition  $j$ ,  $X_{i,j}$ , as the weighted sum of the 393  
activities of each transcription factor  $k$  at condition  $j$ ,  $A_{k,j}$  [17, 43]. Note that although 394  
several methods use transcription factor expression as an approximation for its activity, we 395  
explicitly estimate these values from expression data and a set of a prior known 396  
interactions. Strength and direction (activation or repression) of a regulatory interaction 397  
between transcription factor  $k$  and gene  $i$  is represented by  $w_{i,k}$ . At steady state, we 398  
assume: 399

$$X_{i,j} = \sum_{k \in TFS} w_{i,k} \hat{A}_{k,j} \quad (1)$$

For time-series, we reason that there is a delay  $\tau$  between transcription factor activities 400  
and resulting changes in target gene expression [43]. Given expression of a gene  $i$  in time 401  
 $t_n$ ,  $X_{i,t_n}$ , and activity of transcription factor  $k$  at time  $t_{n-\tau}$ ,  $A_{k,t_{n-\tau}}$ , we assume: 402

$$X_{i,t_n} = \sum_{k \in TFS} w_{i,k} \hat{A}_{k,t_{n-\tau}} \quad (2)$$

If time  $t_n - \tau$  is not available in the expression data, linear interpolation is used to fit 403  
 $A_{k,t_{n-\tau}}$ . 404

Finally, because we expect each gene to be regulated by only a few transcription factors, 405  
we seek a sparse solution for  $w$ . That is, a solution in which most entries in  $w$  are zero. Of 406  
note, we set  $\tau = 15$  for *B. subtilis* [17]. For *S. cerevisiae*, all experiments are considered 407  
steady-state. 408

## Estimating transcription factor activities (TFA)

409

We use the expression of known targets of a transcription factor to estimate its activity.

410

From a set of prior interactions, we build a connectivity matrix  $P$ , where entries represent

411

known activation,  $P_{i,k} = 1$ , or repression,  $P_{i,k} = -1$ , of gene  $i$  by transcription factor  $k$ . If

412

no known interaction,  $P_{i,k} = 0$ . We assume that the expression of a gene can be written as

413

a linear combination of the activities of its prior known regulators [17].

414

$$X_{i,j} = \sum_{p \in TFS} P_{i,k} A_{k,j} \quad (3)$$

In case of time-series experiments, we use the expression of genes at time  $t_{n+\tau/2}$ ,

415

$X_{i,t_{n+\tau/2}}$ , to inform the activities at time  $t_n$ ,  $A_n$ . Note that for estimating activities, the time

416

delay used is  $\tau/2$ . Again, linear interpolation is used to estimate  $X_{i,t_{n+\tau/2}}$  if gene

417

expression at  $t_{n+\tau/2}$  was not measured experimentally [17].

418

$$X_{i,t_{n+\tau/2}} = \sum_{p \in TFS} P_{i,k} A_{k,t_n} \quad (4)$$

In matrix form, both time-series and steady-state equations can be written as  $X = PA$ .

419

Since there are more target genes than regulators  $i > p$ , this is an over-determined

420

system, and thus has no solution, so we approximate  $A$  by finding  $\hat{A}$  that minimizes

421

$\|P\hat{A} - X\|_2^2$ . The solution is given by  $\hat{A} = P^*X$ , where  $P^* = (P^T P)^{-1} P^T$ , the

422

pseudo-inverse of  $P$ . Finally, for transcription factors with no targets in  $P$ , we use the

423

measured expression values as proxy for the activities.

424

## Learning regression parameters

425

Given gene expression and activity estimates, the next step is to define a set of regulatory

426

hypotheses for the observed changes in gene expression. For each gene, we find a

427

sparse solution for the regression coefficients where nonzero values indicate the transcription factors that better explain the changes observed in gene expression. In this section, we explain how we learn these parameters from a single dataset (single-task learning) and from multiple (multitask learning).

### Single-task learning using lasso regression ( $l_1$ )

The lasso (least absolute selection and shrinkage operator) is a method that performs both shrinkage of the regression coefficients and model selection [49]. That is, it shrinks regression coefficients towards zero, while setting some of them to exactly zero. It does so by adding a penalty on the sum of the absolute values of the estimated regression coefficients. Let  $\hat{A}$  be the activities matrix,  $X_i$  the expression values for gene  $i$ , and  $w$  the vector of coefficients, lasso estimates are given by:

$$\arg \min_w \frac{1}{2n} \|X_i - \hat{A}^T w\|_2^2 + \lambda \|w\|_1 \quad (5)$$

where  $\|w\|_1 = \sum_k |w_k|$ . When minimizing the above function, we seek a good fit while subject to a “budget” on the regression coefficients. The hyper-parameter  $\lambda$  controls how much weight to put on the  $l_1$  penalty. The lasso became very popular in the last decade, because it reduces overfitting and automatically performs variable selection. We choose the lasso as a single-task baseline because it is equivalent to the  $S$  matrix in the multitask case (see below), but with independent choice of sparsity parameter for each dataset.

### Multitask learning using sparse block-sparse regression ( $l_1/l_1 + l_1/l_\infty$ )

We extend our core model to the multiple linear regression setting to enable simultaneous parameter estimation. Here we represent regression parameters for a single gene  $i$  as a matrix  $W$ , where rows are transcription factors  $k$  and columns are networks (or datasets)  $d$ .

We seek to learn the support  $Supp(W)$ , where nonzero entries  $W_{k,d}$  represent a regulatory 449  
interaction between transcription factor  $k$  and gene  $i$  for network from dataset  $d$ . 450

$$X_{i,j}^{(d)} = \sum_{k \in TFs} W_{k,d} \hat{A}_{k,j}^{(d)} \quad (6)$$

For a given gene  $i$ , we could assume that the same regulatory network underlies the 451  
expression data in all datasets  $d$ . That is, rows in  $W$  are either completely non-zero or zero. 452  
Since a different set of experiments may have different regulatory patterns, this could be a 453  
very strong assumption. A more realistic scenario would be that for each gene  $i$ , certain 454  
regulators are relevant to regulatory models for all datasets  $d$ , while others may be 455  
selected independently by each model  $d$ . Thus, some rows in the parameter matrix  $W$  are 456  
entirely nonzero or zero, while others do not follow any particular rule. In this scenario, the 457  
main challenge is that a single structural constraint such as row-sparsity does not capture 458  
the structure of the parameter matrix  $W$ . For these problems, a solution is to model the 459  
parameter matrix as the combination of structurally constrained parameters [77]. 460

As proposed by Jalali et al. [32], we learn the regression coefficients by decomposing  $W$  461  
into  $B$  and  $S$ , that encode similarities and differences between regulatory models 462  
respectively. This representation combines a block-regularization penalty on  $B$  enforcing 463  
row-sparsity  $\|B\|_{1,\infty} = \sum_k \|B_k\|_{\infty}$ , where  $\|B_k\|_{\infty} := \max_d |B_{k,d}|$  (as the one from the 464  
previous section), and an elementwise penalty on  $S$  allowing for deviation across 465  
regulatory models for each dataset  $\|S\|_{1,1} = \sum_{k,d} |S_{k,d}|$ . The goal is to leverage any 466  
parameter overlap between models through  $B$ , while accommodating the differences 467  
through  $S$ . We obtain an estimate for  $\hat{W}$  by solving the following optimization problem: 468

$$\arg \min_{S,B} \frac{1}{2n} \sum_d \|X_i^{(d)} - \hat{A}^{(d)T}(S_{*,d} + B_{*,d})\|_2^2 + \lambda_s \|S\|_{1,1} + \lambda_b \|B\|_{1,\infty} \quad (7)$$

$$output : \hat{W} = \hat{B} + \hat{S}$$

## Incorporating prior knowledge using the adaptive lasso

470

We incorporate prior knowledge by differential shrinkage of regression parameters in  $S$

471

through the adaptive lasso [33]. We choose to apply this only to the  $S$  component,

472

because we wanted to allow the user to input different priors for each dataset if so desired.

473

Intuitively, we penalize less interactions present in the prior network. Let  $\Phi$  be a matrix of

474

regulators  $k$  by datasets  $d$ , such that entries  $\Phi_{k,d}$  are inversely proportional to our prior

475

confidence on the interaction between regulator  $k$  and gene  $i$  for dataset  $d$ . We then

476

optimize the following objective:

477

$$\arg \min_{S, B} \frac{1}{2n} \sum_d \|X_i^{(d)} - \hat{A}^{(d)T}(S_{*,d} + B_{*,d})\|_2^2 + \lambda_s \sum_{k,d} |\Phi_{k,d} S_{k,d}| + \lambda_b \|B\|_{1,\infty} \quad (8)$$

478

$$\text{output} : \hat{W} = \hat{B} + \hat{S}$$

We implement this by scaling  $\lambda_s$  by  $\Phi$ , then the penalty applied to  $S_{k,d}$  becomes  $\Phi_{k,d} \lambda_s$ . In

479

the extreme  $\Phi_{k,d} = 0$ , the regulator  $k$  is not penalized and will be necessarily included in

480

the final model for dataset  $d$ . In practice, the algorithm accepts an input prior weight  $\rho \geq 1$

481

that is used to generate the matrix  $\Phi$ . We apply the complexity-penalty reduction afforded

482

by  $\Phi_{k,d}$  to  $\hat{S}$  and not  $\hat{B}$  as this choice penalizes unique terms, creating the correct behavior

483

of encouraging model differences that are in accord with orthogonal data as expressed in

484

the network-prior. This choice is also in accord with the interpretation of the prior as valid

485

in one, but not necessarily all, conditions. If regulator  $k$  is in the prior for dataset  $d$ , then

486

$\Phi_{k,d} = 1/\rho$ , otherwise  $\Phi_{k,d} = 1$ . Finally, we rescale  $\Phi_{*,d}$  to sum to the number of predictors

487

$k$ . Note that each network model accepts its own set of priors.

488

## Model selection

489

As proposed by Jalali et al. [32], for MTL, we set  $\lambda_b = c\sqrt{\frac{d \log p}{n}}$ , with  $n$  being the number of 490  
samples,  $d$  being the number of datasets, and search for  $c$  in the logarithmic interval  $[0.01,$  491  
10]. For each  $\lambda_b$ , we look for  $\lambda_s$  that satisfy  $\frac{1}{2} < \frac{\lambda_s}{\lambda_b} < 1$ . We choose the optimal 492  
combination  $(\lambda_s, \lambda_b)$  that minimizes the extended Bayesian information criterion 493  
(EBIC) [78], here defined as: 494

$$EBIC = \frac{1}{d} \sum_d n_d \ln \frac{1}{n_d} \|X_i^{(d)} - \hat{A}^{(d)T} W_{*,d}\|_2^2 + k_d \ln n_d + 2\gamma \ln \binom{p_d}{k_d} \quad (9)$$

with  $k_d$  being the number of nonzero predictors in  $W$  for model  $d$ , and  $0 \leq \gamma \leq 1$ . Note that 495  
for  $\gamma = 0$ , we recover the original BIC. Whereas for  $\gamma > 0$ , the EBIC scales with the 496  
predictor space  $k$  making it particularly appropriate for scenarios where  $p \gg n$ , often 497  
encountered in biological network inference projects. In this study, we set  $\gamma = 1$ . For STL, 498  
we use the same EBIC measure, but we calculate it for each dataset separately. 499  
Importantly, model selection using EBIC is significantly faster than when compared to 500  
re-sampling approaches, such as cross-validation or stability selection [79]. 501  
Cross-validation, for example, was previously reported as an impediment for multitask 502  
learning in large-scale network inference due computational feasibility [29]. 503

## Implementation

504

We implemented the MTL objective function using cyclical coordinate descent with 505  
covariance updates. That is, at each iteration of the algorithm we cycle through the 506  
predictors (coordinates), and minimize the objective at each predictor  $k$  while keeping the 507  
others fixed. Briefly, for a given  $(\lambda_s, \lambda_b)$ , we update entries in  $S$  and  $B$  respectively, while 508  
keeping other values in these matrices unchanged, for several iterations until convergence. 509  
First, we update values in  $S$  by: 510

$$\hat{S}_{k,d} = \arg \min_{S_{k,d}} \frac{1}{2} \|R_k^{(d)} - S_{k,d} A_k^{(d)}\|_2^2 + \lambda_s \sum_k |S_{*,d}|, \forall k, d \quad (10)$$

with  $R_k^{(d)} = X_i^{(d)} - \sum_{l \neq k} (S_{l,d} + B_{l,d}) A_l^{(d)} - \sum_k B_{k,d} A_{k,d}$ , being the partial residual vector. 511  
 Intuitively, we remove effect of the previous coefficient value for  $S_{k,d}$ , while keeping  $B_{k,d}$  512  
 unchanged and measure how it changes the residuals. This represents a measure of how 513  
 important that feature is to the prediction, and contributes to the decision of whether a 514  
 feature is pushed towards zero or not by the lasso penalty. For  $\lambda_s = 0$ , we can find the 515  
 least squares update,  $\alpha_{k,d} = \langle R_k^{(d)}, A_k^{(d)} \rangle$ , and re-write as 516  
 $\alpha_{k,d} = \langle A_k^{(d)}, X_i^{(d)} \rangle - \sum_{l \neq k} (S_{l,d} + B_{l,d}) \langle A_l^{(d)}, A_k^{(d)} \rangle - B_{k,d} \langle A_k^{(d)}, A_k^{(d)} \rangle$ . This formulation can 517  
 be optimized much quicker using the covariance updates explained below. 518

Then, we update  $\hat{B}_k$ , which represents an entire row in  $B$ , by: 519

$$\hat{B}_k = \arg \min_{B_k} \frac{1}{2} \sum_d \|R_k^{(d)} - B_{k,d} A_k^{(d)}\|_2^2 + \lambda_b \|B_k\|_\infty, \forall k \quad (11)$$

with  $R^{(d)} = X_i^{(d)} - \sum_{l \neq k} (S_{l,d} + B_{l,d}) A_l^{(d)} - \sum_k S_{k,d} A_k^{(d)}$ , being the partial residual vector for 520  
 this case. In this case, we keep the value  $S_{k,d}$  unchanged, and set  $B_{k,d}$  to zero. Similarly, 521  
 we remove effects from previous  $B_{k,d}$  and evaluate how this feature is for the prediction; 522  
 this then contributes to the decision of whether this entire row is sent to zero by the infinity 523  
 norm penalty. For  $\lambda_b = 0$ , we can find the least squares update,  $\alpha_{k,d} = \langle R^{(d)}, A_k^{(d)} \rangle$ , which 524  
 can be re-written as  $\alpha_{k,d} = \langle A_k^{(d)}, X_i^{(d)} \rangle - \sum_{l \neq k} (S_{l,d} + B_{l,d}) \langle A_l^{(d)}, A_k^{(d)} \rangle - S_{k,d} \langle A_k^{(d)}, A_k^{(d)} \rangle$ . 525  
 Finally, we apply soft-thresholding to penalize the least-squares updates. 526

Using these formulations for the updates, we can use the idea of covariance 527  
 updates [50, 80], where the cross-products  $A^T A$  and  $A^T X$  are stored in separate matrices 528  
 and reused at every iteration. Because these cross-products correspond to over 95% of 529  
 computation time, this trick decreases runtime significantly. To further decrease runtime, 530  
 we also employ warm starts when searching for optimal penalty values  $(\lambda_s, \lambda_b)$  [80]. 531

Additionally, since we infer regulators for each gene separately, we can parallelize calculations by gene.

## Estimating prediction confidence scores

For each predicted interaction we compute a confidence score that represents how well a predictor explains the expression data, and a measure of prediction stability. As previously proposed [17, 43], we calculate confidence scores for each interaction by:

$$c_{k,i} = 1 - \frac{\sigma_{full\ model\ for\ x_i}^2}{\sigma_{model\ for\ x_i\ without\ predictor\ k}^2} \quad (12)$$

where  $\sigma^2$  equals the variance of the residuals for the models, with and without predictor  $k$ . The score  $c_{k,i}$  is proportional to how much removing regulator  $k$  from gene  $i$  set of predictors decreases model fit. To measure stability, we perform the inference across multiple bootstraps of the expression data (we used 20 bootstraps for both *B. subtilis* and yeast), rank-average the interactions across all bootstraps [16, 43], and re-scale the ranking between 0 and 1 to output a final ranked list of regulatory hypotheses.

## Implementation and Availability

The *Inferelator-AMuSR* code and example datasets are available at [https://github.com/simonsfoundation/multitask\\_inferelator/tree/AMuSR](https://github.com/simonsfoundation/multitask_inferelator/tree/AMuSR).

## References

1. Margolin AA, Nemenman I, Basso K, Wiggins C, Stolovitzky G, Dalla Favera R, et al. ARACNE: an algorithm for the reconstruction of gene regulatory networks in a



- mammalian cellular context. *BMC bioinformatics*. 2006;7(1):S7.
2. Petralia F, Wang P, Yang J, Tu Z. Integrative random forest for gene regulatory network inference. *Bioinformatics*. 2015;31(12):i197–i205.
  3. Bonneau R, Reiss DJ, Shannon P, Facciotti M, Hood L, Baliga NS, et al. The Inferelator: an algorithm for learning parsimonious regulatory networks from systems-biology data sets de novo. *Genome biology*. 2006;7(5):R36.
  4. Yosef N, Shalek AK, Gaublotte JT, Jin H, Lee Y, Awasthi A, et al. Dynamic regulatory network controlling TH17 cell differentiation. *Nature*. 2013;496(7446):461.
  5. Ciofani M, Madar A, Galan C, Sellars M, Mace K, Pauli F, et al. A validated regulatory network for Th17 cell specification. *Cell*. 2012;151(2):289–303.
  6. Rung J, Brazma A. Reuse of public genome-wide gene expression data. *Nature reviews Genetics*. 2013;14(2):89.
  7. Koch C, Konieczka J, Delorey T, Lyons A, Socha A, Davis K, et al. Inference and Evolutionary Analysis of Genome-Scale Regulatory Networks in Large Phylogenies. *Cell systems*. 2017;4(5):543–558.
  8. Muir P, Li S, Lou S, Wang D, Spakowicz DJ, Salichos L, et al. The real cost of sequencing: scaling computation to keep pace with data generation. *Genome biology*. 2016;17(1):53.
  9. Marx V. Biology: The big challenges of big data. *Nature*. 2013;498(7453):255–260.
  10. Leek JT, Scharpf RB, Bravo HC, Simcha D, Langmead B, Johnson WE, et al. Tackling the widespread and critical impact of batch effects in high-throughput data. *Nature reviews Genetics*. 2010;11(10).
  11. Nayfach S, Pollard KS. Toward accurate and quantitative comparative metagenomics. *Cell*. 2016;166(5):1103–1116.

12. Pritchard CC, Cheng HH, Tewari M. MicroRNA profiling: approaches and considerations. *Nature reviews Genetics*. 2012;13(5):358.
13. Tung PY, Blischak JD, Hsiao CJ, Knowles DA, Burnett JE, Pritchard JK, et al. Batch effects and the effective design of single-cell gene expression studies. *Scientific reports*. 2017;7:39921.
14. Auer PL, Doerge R. Statistical design and analysis of RNA sequencing data. *Genetics*. 2010;185(2):405–416.
15. Nygaard V, Rødland EA, Hovig E. Methods that remove batch effects while retaining group differences may lead to exaggerated confidence in downstream analyses. *Biostatistics*. 2016;17(1):29–39.
16. Marbach D, Costello JC, Küffner R, Vega NM, Prill RJ, Camacho DM, et al. Wisdom of crowds for robust gene network inference. *Nature Methods*. 2012;9(8):796–804.
17. Arrieta-Ortiz ML, Hafemeister C, Bate AR, Chu T, Greenfield A, Shuster B, et al. An experimentally supported model of the *Bacillus subtilis* global transcriptional regulatory network. *Molecular Systems Biology*. 2015;11(11):839.
18. Dietterich TG, et al. Ensemble methods in machine learning. *Multiple classifier systems*. 2000;1857:1–15.
19. Papp B, Oliver S. Genome-wide analysis of the context-dependence of regulatory networks. *Genome biology*. 2005;6(2):206.
20. Harbison CT, Gordon DB, Lee TI, Rinaldi NJ, Macisaac KD, Danford TW, et al. Transcriptional regulatory code of a eukaryotic genome. *Nature*. 2004;431(7004):99–104.
21. Siahpirani AF, Roy S. A prior-based integrative framework for functional transcriptional regulatory network inference. *Nucleic acids research*. 2017;45(4):e21–e21.

22. Buenrostro JD, Giresi PG, Zaba LC, Chang HY, Greenleaf WJ. Transposition of native chromatin for fast and sensitive epigenomic profiling of open chromatin, DNA-binding proteins and nucleosome position. *Nature methods*. 2013;10(12):1213.
23. Boyle AP, Davis S, Shulha HP, Meltzer P, Margulies EH, Weng Z, et al. High-resolution mapping and characterization of open chromatin across the genome. *Cell*. 2008;132(2):311–322.
24. Johnson DS, Mortazavi A, Myers RM, Wold B. Genome-wide mapping of in vivo protein-DNA interactions. *Science*. 2007;316(5830):1497–1502.
25. Lam KY, Westrick ZM, Müller CL, Christiaen L, Bonneau R. Fused regression for multi-source gene regulatory network inference. *PLoS computational biology*. 2016;12(12):e1005157.
26. Omranian N, Eloundou-Mbebi JM, Mueller-Roeber B, Nikoloski Z. Gene regulatory network inference using fused LASSO on multiple data sets. *Scientific reports*. 2016;6:20533.
27. Jain S, Gitter A, Bar-Joseph Z. Multitask learning of signaling and regulatory networks with application to studying human response to flu. *PLoS computational biology*. 2014;10(12):e1003943.
28. Wang Y, Joshi T, Zhang XS, Xu D, Chen L. Inferring gene regulatory networks from multiple microarray datasets. *Bioinformatics*. 2006;22(19):2413–2420.
29. Chasman D, Walters KB, Lopes TJ, Einfeld AJ, Kawaoka Y, Roy S. Integrating Transcriptomic and Proteomic Data Using Predictive Regulatory Network Models of Host Response to Pathogens. *PLoS computational biology*. 2016;12(7):e1005013.
30. Gupta R, Stincone A, Antczak P, Durant S, Bicknell R, Bikfalvi A, et al. A computational framework for gene regulatory network inference that combines multiple methods and datasets. *BMC systems biology*. 2011;5(1):52.

31. Qin J, Hu Y, Xu F, Yalamanchili HK, Wang J. Inferring gene regulatory networks by integrating ChIP-seq/chip and transcriptome data via LASSO-type regularization methods. *Methods*. 2014;67(3):294–303.
32. Jalali A, Sanghavi S, Ruan C, Ravikumar PK. A dirty model for multi-task learning. In: *Advances in Neural Information Processing Systems*; 2010. p. 964–972.
33. Zou H. The adaptive lasso and its oracle properties. *Journal of the American statistical association*. 2006;101(476):1418–1429.
34. Caruana R. Multitask learning. In: *Learning to learn*. Springer; 1998. p. 95–133.
35. Chen X, Xuan J, Wang C, Shajahan AN, Riggins RB, Clarke R. Reconstruction of transcriptional regulatory networks by stability-based network component analysis. *IEEE/ACM transactions on computational biology and bioinformatics*. 2013;10(6):1347–1358.
36. Fu Y, Jarboe LR, Dickerson JA. Reconstructing genome-wide regulatory network of *E. coli* using transcriptome data and predicted transcription factor activities. *BMC bioinformatics*. 2011;12(1):233.
37. Dai Z, Iqbal M, Lawrence ND, Rattray M. Efficient inference for sparse latent variable models of transcriptional regulation. *Bioinformatics*. 2017;33(23):3776–3783.
38. Liao JC, Boscolo R, Yang YL, Tran LM, Sabatti C, Roychowdhury VP. Network component analysis: reconstruction of regulatory signals in biological systems. *Proceedings of the National Academy of Sciences*. 2003;100(26):15522–15527.
39. Sanguinetti G, Lawrence ND, Rattray M. Probabilistic inference of transcription factor concentrations and gene-specific regulatory activities. *Bioinformatics*. 2006;22(22):2775–2781.
40. Filtz TM, Vogel WK, Leid M. Regulation of transcription factor activity by interconnected post-translational modifications. *Trends in pharmacological sciences*. 2014;35(2):76–85.

41. Ravasi T, Suzuki H, Cannistraci CV, Katayama S, Bajic VB, Tan K, et al. An atlas of combinatorial transcriptional regulation in mouse and man. *Cell*. 2010;140(5):744–752.
42. Shlyueva D, Stampfel G, Stark A. Transcriptional enhancers: from properties to genome-wide predictions. *Nature Reviews Genetics*. 2014;15(4):272–286.
43. Greenfield A, Hafemeister C, Bonneau R. Robust data-driven incorporation of prior knowledge into the inference of dynamic regulatory networks. *Bioinformatics*. 2013;29:1060–1067.
44. Han H, Shim H, Shin D, Shim JE, Ko Y, Shin J, et al. TRRUST: a reference database of human transcriptional regulatory interactions. *Scientific reports*. 2015;5:11432.
45. Gama-Castro S, Salgado H, Peralta-Gil M, Santos-Zavaleta A, Muniz-Rascado L, Solano-Lira H, et al. RegulonDB version 7.0: transcriptional regulation of *Escherichia coli* K-12 integrated within genetic sensory response units (Gensor Units). *Nucleic acids research*. 2010;39(suppl\_1):D98–D105.
46. Michna RH, Zhu B, Mäder U, Stülke J. Subti Wiki 2.0—an integrated database for the model organism *Bacillus subtilis*. *Nucleic acids research*. 2015;44(D1):D654–D662.
47. Teixeira MC, Monteiro P, Jain P, Tenreiro S, Fernandes AR, Mira NP, et al. The YEASTRACT database: a tool for the analysis of transcription regulatory associations in *Saccharomyces cerevisiae*. *Nucleic acids research*. 2006;34(suppl\_1):D446–D451.
48. Arnone MI, Davidson EH. The hardwiring of development: organization and function of genomic regulatory systems. *Development*. 1997;124(10):1851–1864.
49. Tibshirani R. Regression shrinkage and selection via the lasso. *Journal of the Royal Statistical Society Series B (Methodological)*. 1996; p. 267–288.
50. Liu H, Palatucci M, Zhang J. Blockwise coordinate descent procedures for the multi-task lasso, with applications to neural semantic basis discovery. In:

- Proceedings of the 26th Annual International Conference on Machine Learning.  
ACM; 2009. p. 649–656.
51. Tchourine K, Vogel C, Bonneau R. Condition-Specific Modeling of Biophysical Parameters Advances Inference of Regulatory Networks. *Cell reports*. 2018;23(2):376–388.
52. Nicolas P, Mäder U, Dervyn E, Rochat T, Leduc A, Pigeonneau N, et al. Condition-dependent transcriptome reveals high-level regulatory architecture in *Bacillus subtilis*. *Science*. 2012;335(6072):1103–1106.
53. Hibbs MA, Hess DC, Myers CL, Huttenhower C, Li K, Troyanskaya OG. Exploring the functional landscape of gene expression: directed search of large microarray compendia. *Bioinformatics*. 2007;23(20):2692–2699.
54. Knijnenburg TA, Daran JMG, van den Broek MA, Daran-Lapujade PA, de Winde JH, Pronk JT, et al. Combinatorial effects of environmental parameters on transcriptional regulation in *Saccharomyces cerevisiae*: a quantitative analysis of a compendium of chemostat-based transcriptome data. *BMC genomics*. 2009;10(1):53.
55. Smith EN, Kruglyak L. Gene–environment interaction in yeast gene expression. *PLoS biology*. 2008;6(4):e83.
56. Hughes TR, Marton MJ, Jones AR, Roberts CJ, Stoughton R, Armour CD, et al. Functional discovery via a compendium of expression profiles. *Cell*. 2000;102(1):109–126.
57. Costanzo MC, Engel SR, Wong ED, Lloyd P, Karra K, Chan ET, et al. *Saccharomyces* genome database provides new regulation data. *Nucleic acids research*. 2013;42(D1):D717–D725.
58. Weirauch MT, Yang A, Albu M, Cote AG, Montenegro-Montero A, Drewe P, et al. Determination and inference of eukaryotic transcription factor sequence specificity. *Cell*. 2014;158(6):1431–1443.

59. Grant CE, Bailey TL, Noble WS. FIMO: scanning for occurrences of a given motif. *Bioinformatics*. 2011;27(7):1017–1018.
60. Karwacz K, Miraldi ER, Pokrovskii M, Madi A, Yosef N, Wortman I, et al. Critical role of IRF1 and BATF in forming chromatin landscape during type 1 regulatory cell differentiation. *Nature immunology*. 2017;18(4):412.
61. Wilkins O, Hafemeister C, Plessis A, Holloway-Phillips MM, Pham GM, Nicotra AB, et al. EGRINs (Environmental Gene Regulatory Influence Networks) in rice that function in the response to water deficit, high temperature, and agricultural environments. *The Plant Cell*. 2016; p. tpc–00158.
62. Balakrishnan R, Park J, Karra K, Hitz BC, Binkley G, Hong EL, et al. YeastMine—an integrated data warehouse for *Saccharomyces cerevisiae* data as a multipurpose tool-kit. *Database*. 2012;2012.
63. Tsompana M, Buck MJ. Chromatin accessibility: a window into the genome. *Epigenetics & chromatin*. 2014;7(1):33.
64. Kittler J, Hatef M, Duin RP, Matas J. On combining classifiers. *IEEE transactions on pattern analysis and machine intelligence*. 1998;20(3):226–239.
65. Johnson WE, Li C, Rabinovic A. Adjusting batch effects in microarray expression data using empirical Bayes methods. *Biostatistics*. 2007;8(1):118–127.
66. Müller C, Schillert A, Röthemeier C, Trégouët DA, Proust C, Binder H, et al. Removing Batch Effects from Longitudinal Gene Expression-Quantile Normalization Plus ComBat as Best Approach for Microarray Transcriptome Data. *PloS one*. 2016;11(6):e0156594.
67. MacNeil LT, Walhout AJ. Gene regulatory networks and the role of robustness and stochasticity in the control of gene expression. *Genome research*. 2011;21(5):645–657.

68. Gitter A, Siegfried Z, Klutstein M, Fornes O, Oliva B, Simon I, et al. Backup in gene regulatory networks explains differences between binding and knockout results. *Molecular systems biology*. 2009;5(1):276.
69. Hecker M, Lambeck S, Toepfer S, Van Someren E, Guthke R. Gene regulatory network inference: data integration in dynamic models—a review. *Biosystems*. 2009;96(1):86–103.
70. Waltman P, Kacmarczyk T, Bate AR, Kearns DB, Reiss DJ, Eichenberger P, et al. Multi-species integrative biclustering. *Genome biology*. 2010;11(9):R96.
71. Schep AN, Buenrostro JD, Denny SK, Schwartz K, Sherlock G, Greenleaf WJ. Structured nucleosome fingerprints enable high-resolution mapping of chromatin architecture within regulatory regions. *Genome research*. 2015;25(11):1757–1770.
72. Leinonen R, Akhtar R, Birney E, Bower L, Cerdeno-Tárraga A, Cheng Y, et al. The European nucleotide archive. *Nucleic acids research*. 2010;39(suppl\_1):D28–D31.
73. Langmead B, Salzberg SL. Fast gapped-read alignment with Bowtie 2. *Nature methods*. 2012;9(4):357–359.
74. Zhang Y, Liu T, Meyer CA, Eeckhoute J, Johnson DS, Bernstein BE, et al. Model-based analysis of ChIP-Seq (MACS). *Genome biology*. 2008;9(9):R137.
75. de Boer CG, Hughes TR. YeTFaSCo: a database of evaluated yeast transcription factor sequence specificities. *Nucleic acids research*. 2011;40(D1):D169–D179.
76. Cherry JM. The *Saccharomyces* Genome Database: A Tool for Discovery. *Cold Spring Harbor Protocols*. 2015;2015(12):pdb–top083840.
77. Yang E, Ravikumar PK. Dirty statistical models. In: *Advances in Neural Information Processing Systems*; 2013. p. 611–619.
78. Chen J, Chen Z. Extended Bayesian information criteria for model selection with large model spaces. *Biometrika*. 2008;95(3):759–771.



79. Meinshausen N, Bühlmann P. Stability selection. *Journal of the Royal Statistical Society: Series B (Statistical Methodology)*. 2010;72(4):417–473.
80. Friedman J, Hastie T, Tibshirani R. Regularization paths for generalized linear models via coordinate descent. *Journal of statistical software*. 2010;33(1):1.

## Figure Legends

**Fig 1: Gene regulatory network inference schematic.** (A) Our network inference algorithm takes as input a gene expression matrix,  $X$ , and a prior on network structure and outputs regulatory hypotheses of regulator-target interactions. (B) Using priors on network topology and gene expression data, we estimate transcription factor activities (TFA), and subsequently model gene expression as a function of these activities. (C) We use several possible sources of prior information on network topology. (D) Prior information is encoded in a matrix  $P$ , where positive and negative entries represent known activation and repression respectively, whereas zeros represent absence of known regulatory interaction. To estimate hidden activities, we consider  $X = PA$  (top), where the only unknown is the activities. Of note, a time-delay is implemented for time-series experiments (bottom). (E) Finally, for each gene, we find regulators that influence its expression using regularized linear regression. We either learn these influences, or weights, for each dataset independently, single-task learning (top), or jointly through multi-task learning (bottom).

**Fig 2: Representation of the weights matrix for one gene in the multitask setting.** We represent model coefficients as a matrix  $W$  (predictors by datasets) where nonzero rows represent predictors relevant for all datasets. We decompose the weights into two components, and regularize them differently, using a sparse penalty ( $l_1/l_1$  to  $S$  component) to encode a dataset-specific component and a block-sparse penalty ( $l_1/l_\infty$  to  $B$  component) to encode a conserved one. To illustrate, in this example, non-zero weights are shown on the right side. Note that, in this schematic example, regulators  $w_3$  and  $w_7$  are shared between all datasets. We also show the objective function minimized to estimate  $S$  and  $B$  on the bottom (for details, see methods).

**Fig 3: Multitask learning improves accuracy of inferred networks.** (A) Relationship between TF activity and target expression in *B. subtilis* 1 (blue) and in *B. subtilis* 2

(orange), and corresponding STL and MTL inferred confidence scores for an example of an interaction in the *B. subtilis* gold-standard, *sigB* to *ydfP*. (B) as shown in (A), but for an interaction in the *S. cerevisiae* gold-standard, Rap1 to Rpl12a. (C) Precision-recall curves assessing accuracy of network models inferred for individual *B. subtilis* datasets against a leave-out set of interactions. Barplot show mean area under precision-recall curve (AUPR) for each method and dataset. Error bars show the standard deviation across 10 splits of the gold-standard into prior and evaluation set. (D) Precision-recall curves assessing accuracy of network models inferred for individual *S. cerevisiae* networks, with the difference that the prior is from an independent source (no splits or replicates).

**Fig 4: Multitask learning performance boost outweighs benefits of other data integration methods.** Assessment of accuracy of network models learned using three different data integration strategies, data merging and batch correction (STL-BC), ensemble method combining models learned independently (STL-C), and ensemble method combining models learned jointly (MTL-C). (A) Precision-recall curves for *B. subtilis*, again using a leave-out set of interactions. Barplot show mean area under precision-recall curve (AUPR) for each method. Error bars show the standard deviation across 10 splits of the gold-standard into prior and evaluation set. (B) Precision-recall curves for *S. cerevisiae*, with the difference that the prior is from an independent source (no splits or replicates).

**Fig 5: Recovery of prior interactions depends on prior quality and is robust to increasing prior weights.** Distribution of number of regulators per target in the *B. subtilis* prior (A), for the *S. cerevisiae* gold-standard (B), and for the *S. cerevisiae* chromatin accessibility-derived priors (C). (D) Distributions of MTL inferred confidence scores for interactions in the prior for each dataset. Different colors show prior weights used, and represent an amount by which interactions in the prior are favored by model selection when compared to interactions without prior information. (E) Distributions of MTL inferred

confidence scores for true (yellow) and false (gray) interactions in the prior for each dataset. (F) Counts of MTL inferred interactions with non-zero confidence scores for true (yellow) and false (gray) interactions in the prior for each dataset.

**Fig 6: Overlap of edges in inferred networks is higher for *B. subtilis* than for *S. cerevisiae*.** Edges overlap across networks inferred using multitask learning for *B. subtilis* (prior weight of 1.0) (A), for *S. cerevisiae* (using the gold-standard as priors) (B), for *S. cerevisiae* (using the chromatin accessibility-derived priors) (C).

## Supplemental Figure Legends

**Fig S1: Multitask learning (without TF activities) improves accuracy of inferred networks.** (A) Precision-recall curves assessing accuracy of network models inferred without TF activities for individual *B. subtilis* datasets against the whole gold-standard set of interactions. Networks Barplot show mean area under precision-recall curve (AUPR) for each method and dataset. (B) Precision-recall curves assessing accuracy of network models inferred without TF activities for individual *S. cerevisiae* networks, with the difference that priors are derived from chromatin accessibility data.

**Fig S2: Multitask learning (without TF activities) performance boost outweighs benefits of other data integration methods for yeast, but not for *B. subtilis*.**

Assessment of accuracy of network models learned using three different data integration strategies, data merging and batch correction (STL-BC), ensemble method combining models learned independently (STL-C), and ensemble method combining models learned jointly (MTL-C). TF expression was used as predictors of gene expression. (A) Precision-recall curves for *B. subtilis*, again using the whole gold-standard set of interactions. Barplot show mean area under precision-recall curve (AUPR) for each method. (B) Precision-recall curves for *S. cerevisiae*, with the difference that priors are derived from chromatin accessibility data.

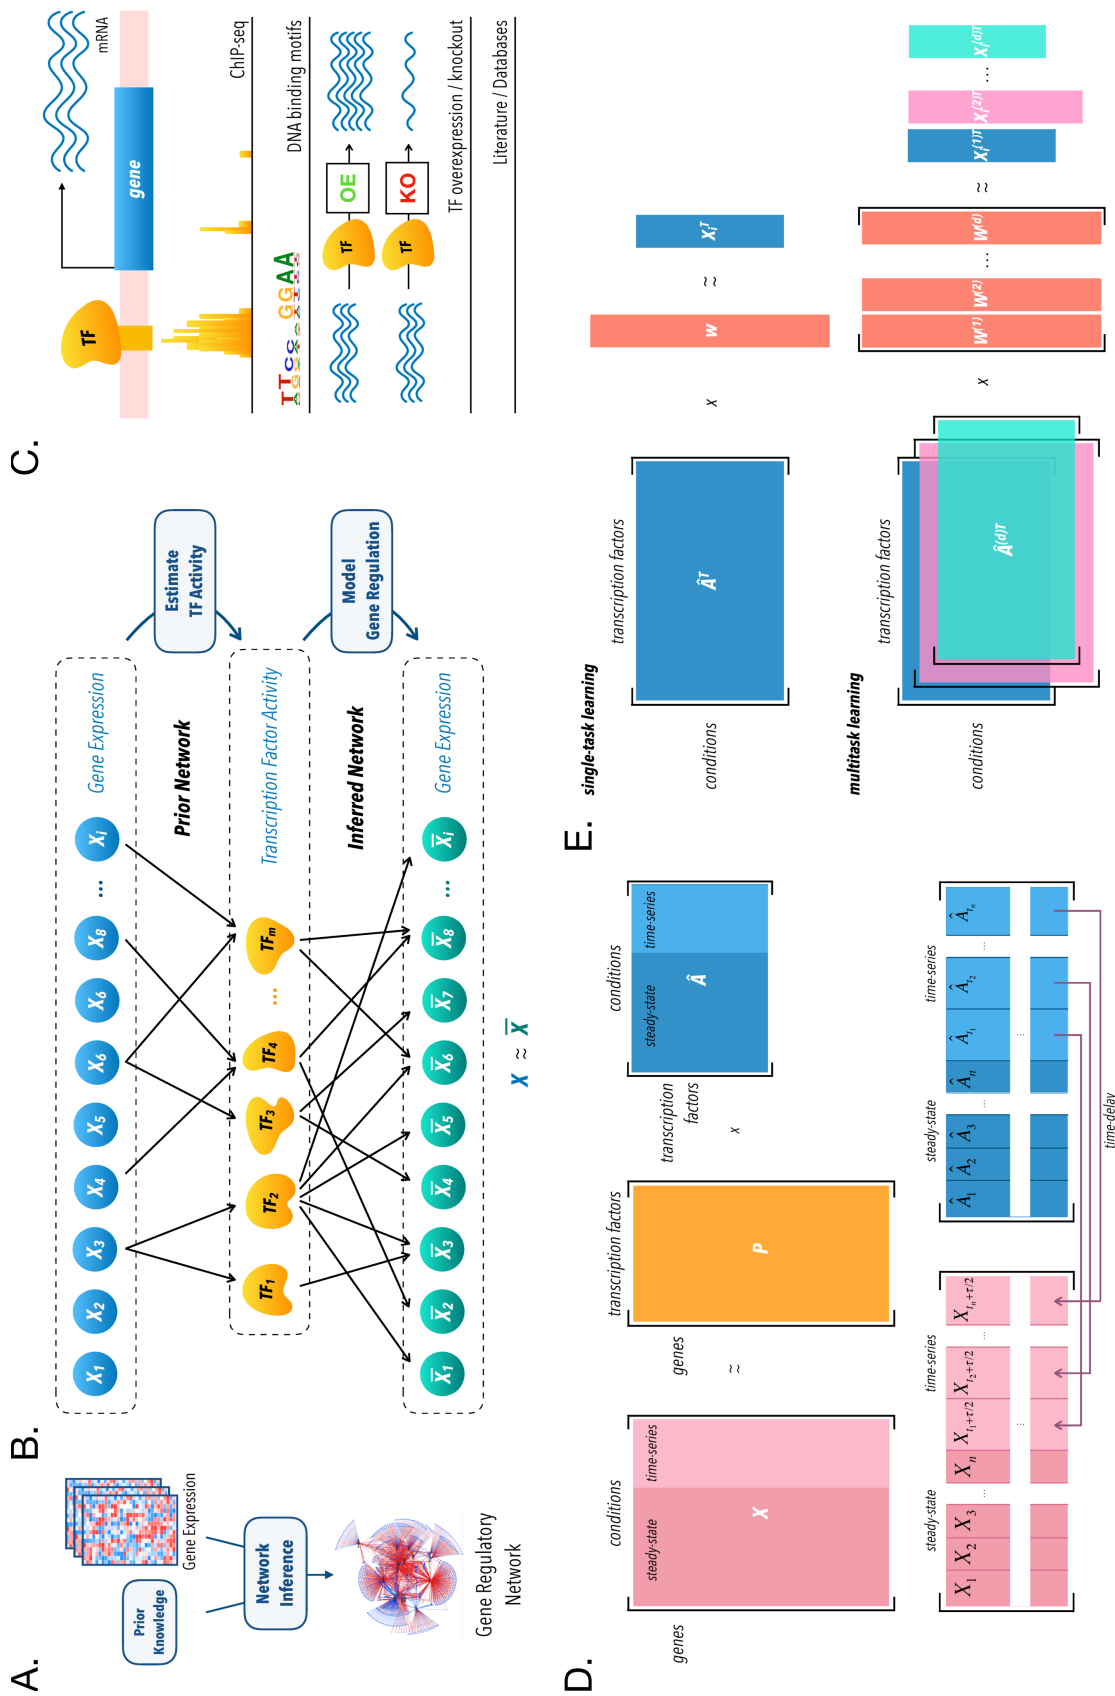

**Fig 1.** Gene regulatory network inference schematic

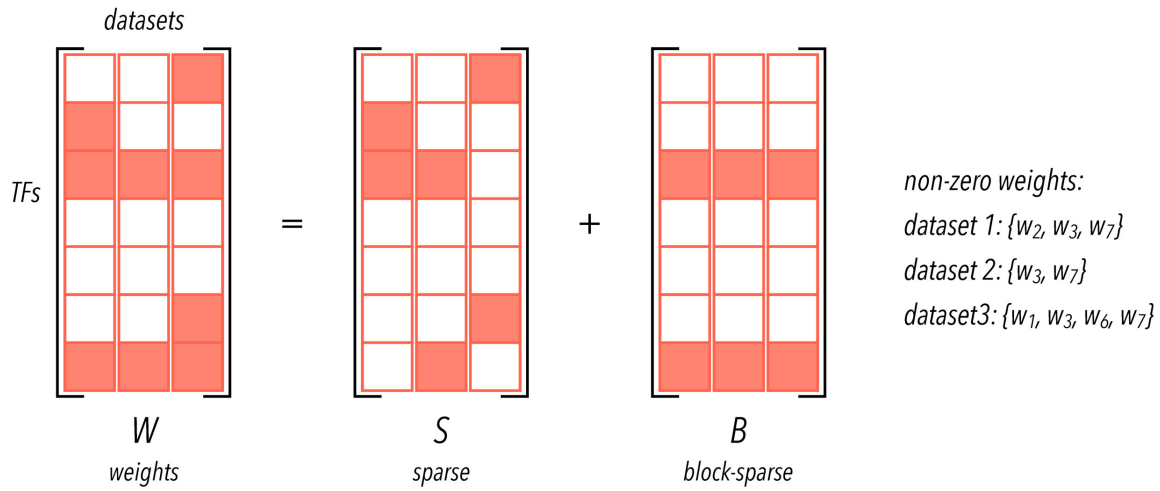

$$\arg \min_{S, B} \frac{1}{2n} \sum_d \|X_i^{(d)} - \hat{A}^{(d)T}(S_{*,d} + B_{*,d})\|_2^2 + \lambda_s \sum_{k,d} |\Phi_{k,d} S_{k,d}| + \lambda_b \|B\|_{1,\infty}$$

$$\text{output} : \hat{W} = \hat{B} + \hat{S}$$

**Fig 2.** Representation of the weights matrix for one gene in the multitask setting.

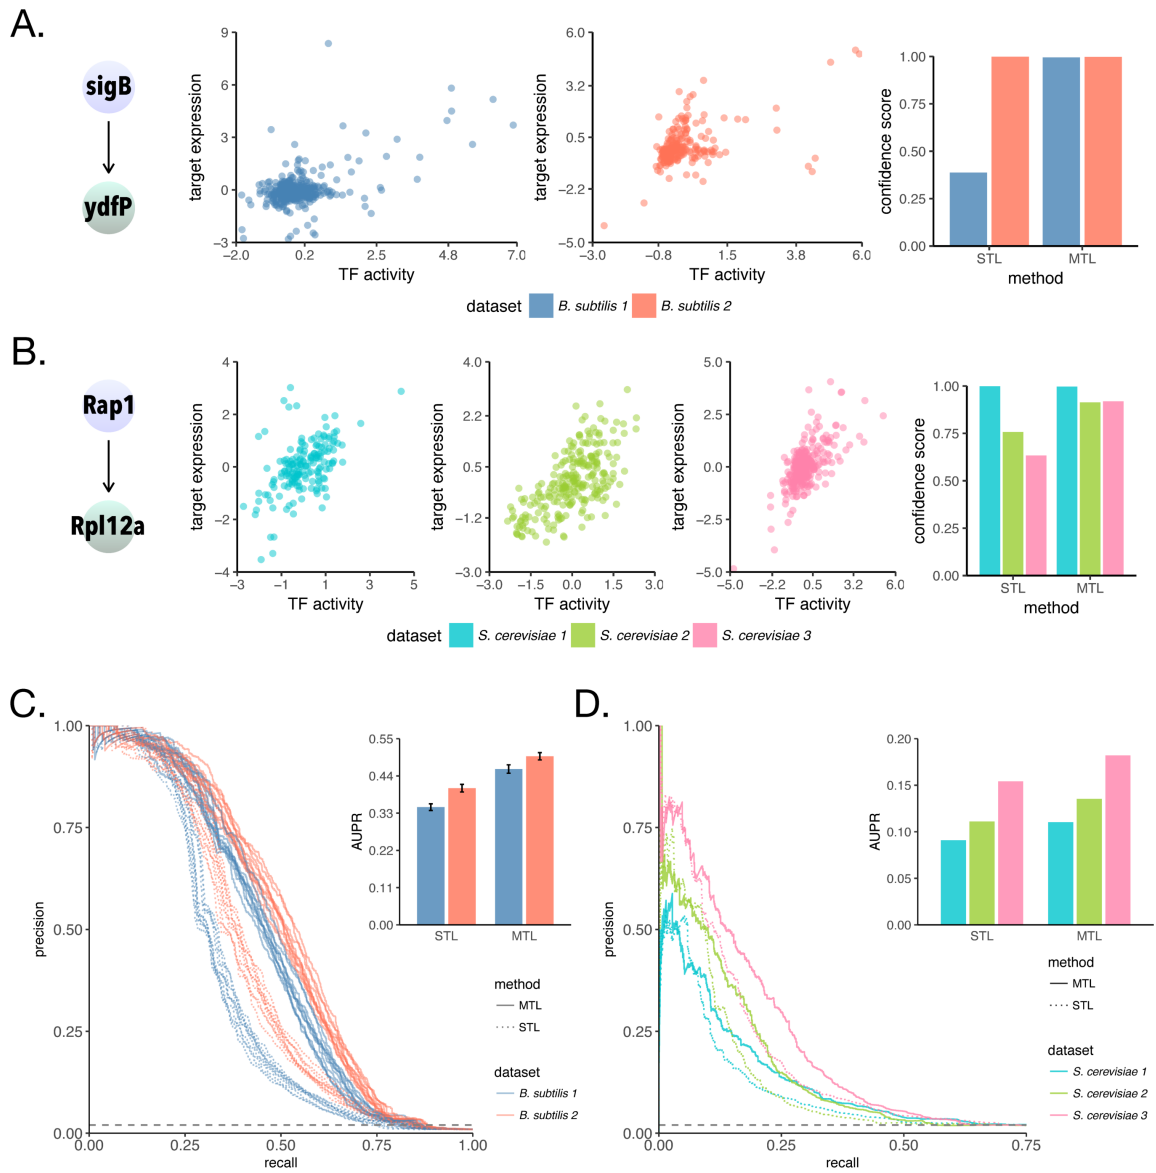

**Fig 3.** Multitask learning improves accuracy of inferred networks



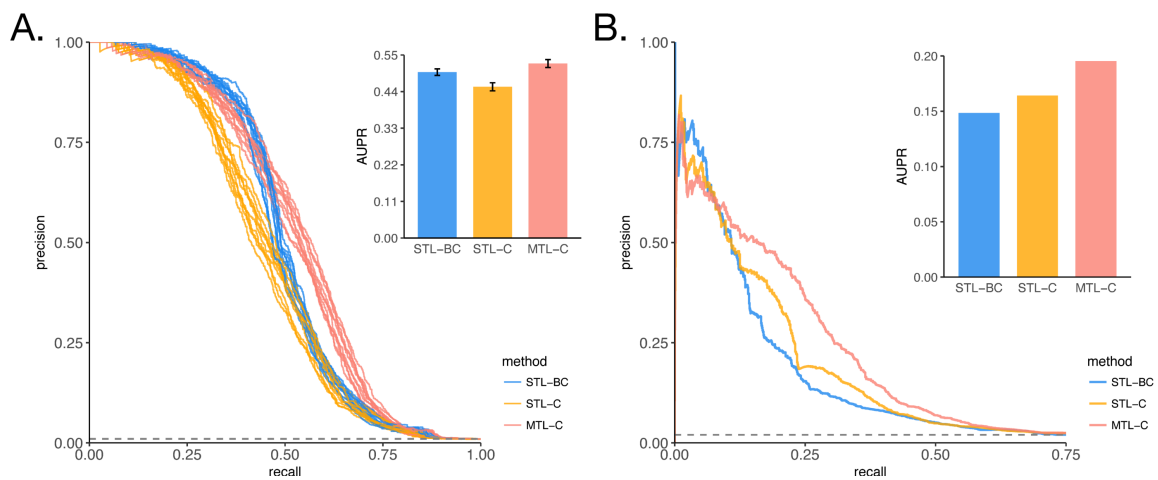

**Fig 4.** Multitask Learning boost in performance outweighs benefits of other data integration methods

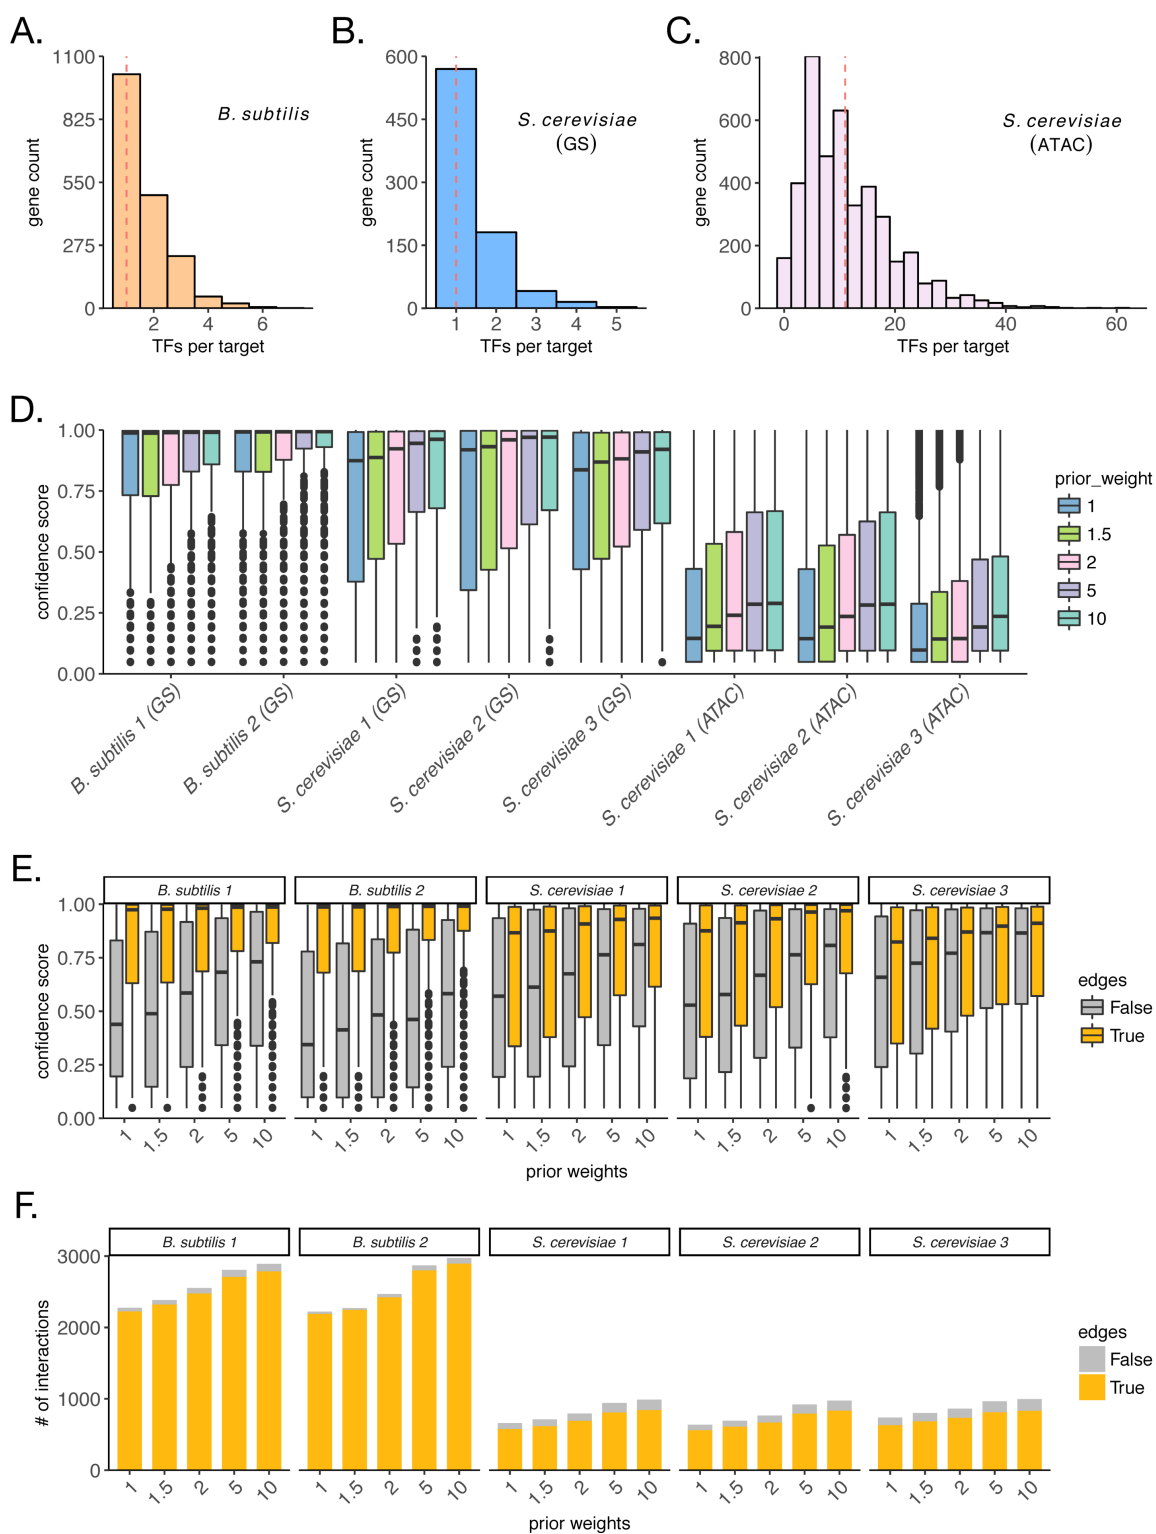

**Fig 5.** Recovery of prior interactions depends on prior quality and is robust to increasing prior weights

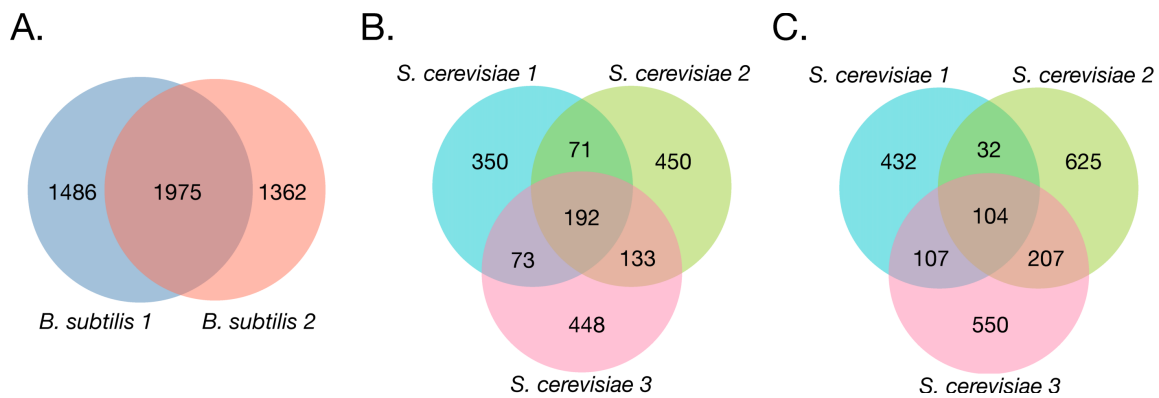

**Fig 6.** Cross-dataset overlap of inferred edges is higher for *B. subtilis* than for *S. cerevisiae*

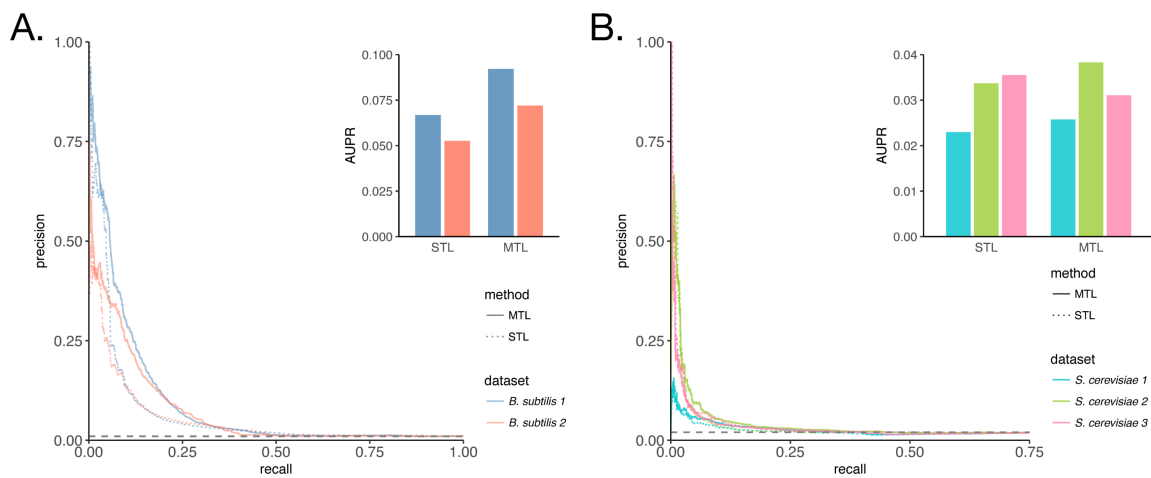

**Fig S1.** Multitask learning (without TF activities) improves accuracy of inferred networks.

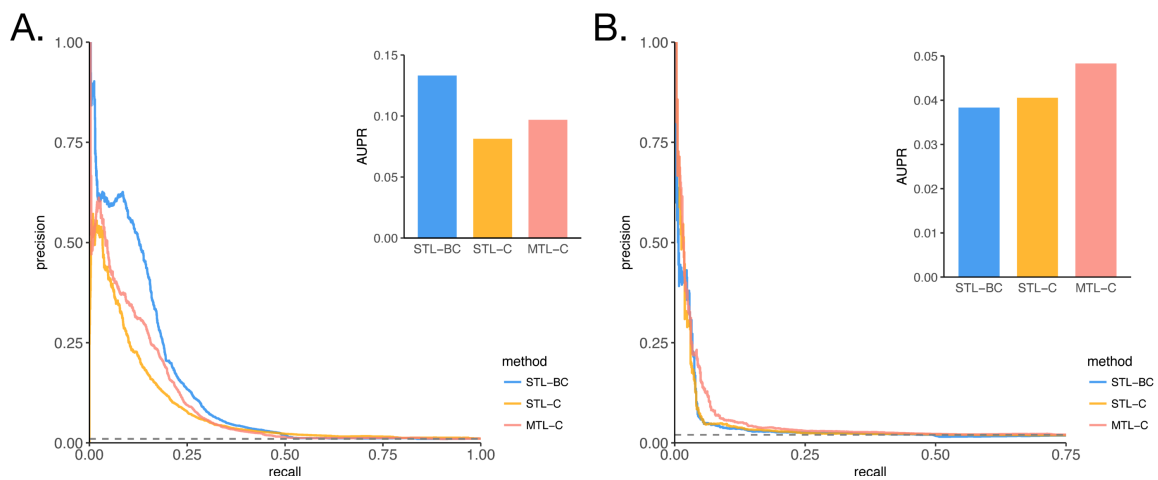

**Fig S2.** Multitask learning (without TF activities) performance boost outweighs benefits of other data integration methods for yeast, but not for *B. subtilis*.
